# Supplementary material
Source: PubMed Central journal article supplement (PMC4679639)

Supplemental Figure 1: Proportion of BIC Favoring Gompertz Model

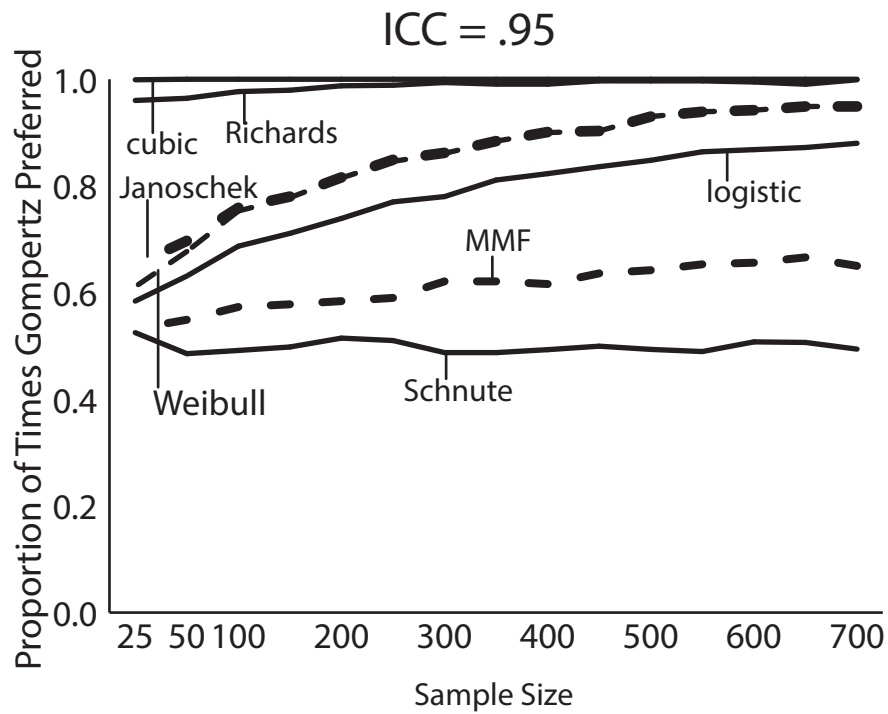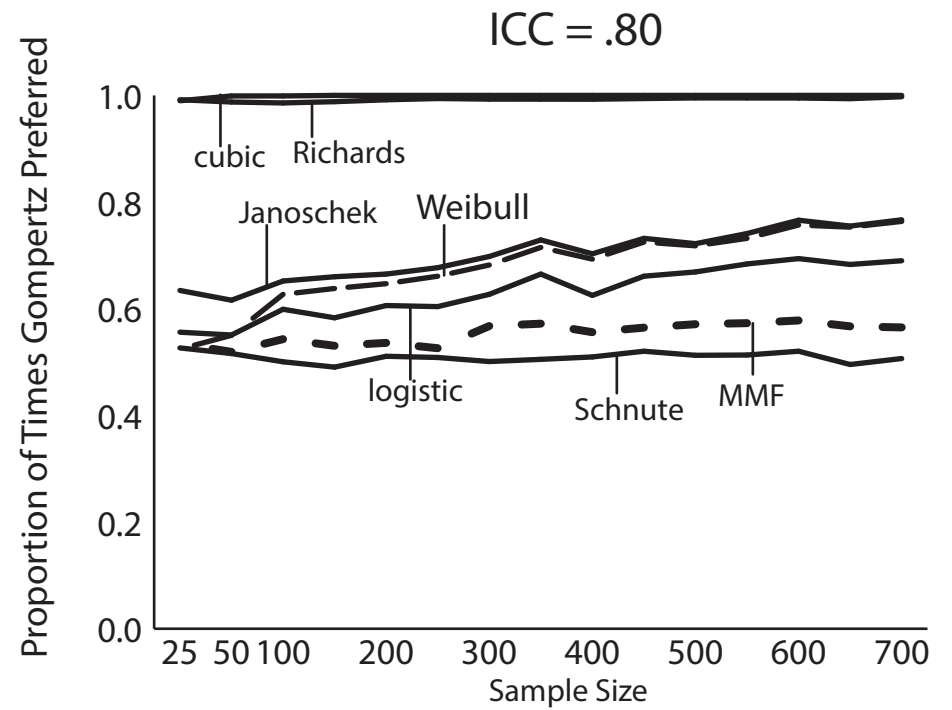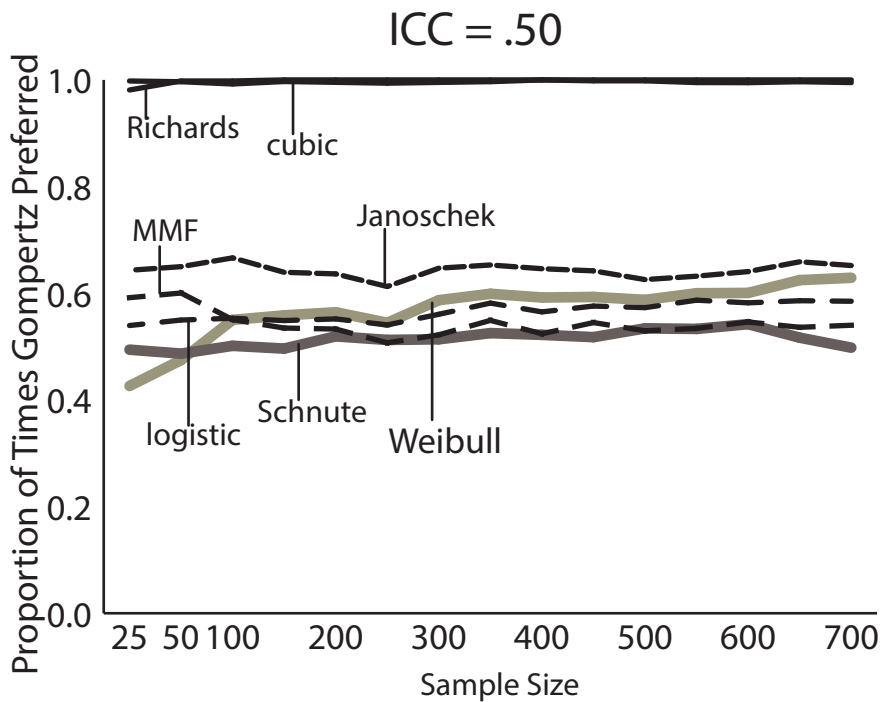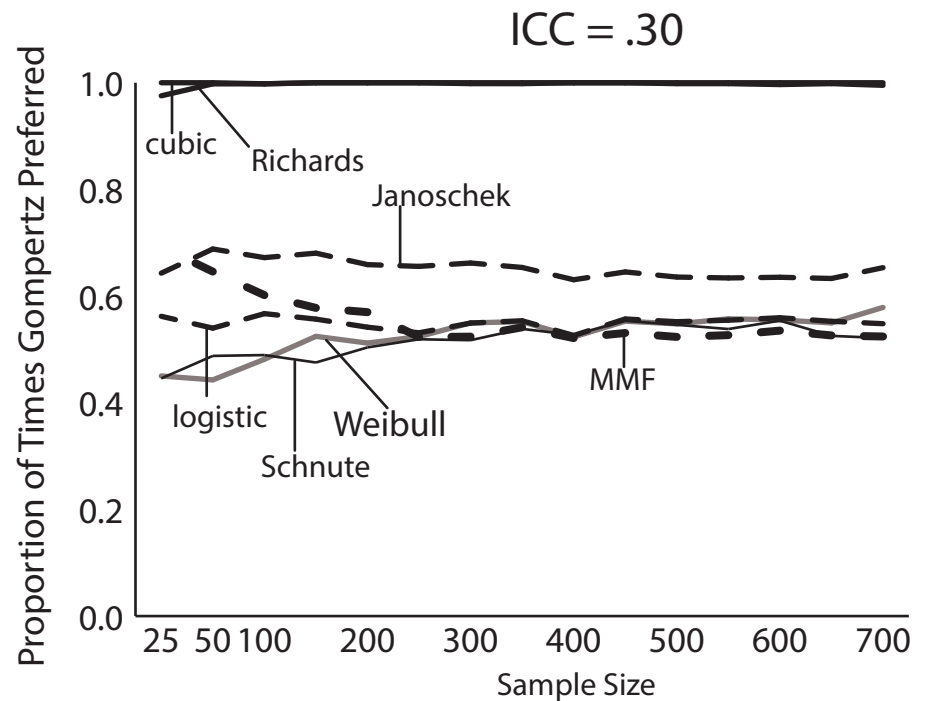

Supplement: NIHMS696400-supplement-S1.pdf [file NIHMS696400-supplement-S1.pdf]
